# Supplementary material
Source: PubMed Central journal article supplement (PMC3926089)
Supplement: 1318460111_pnas.201318460SI.pdf [file 1318460111_pnas.201318460SI.pdf]

# Supporting Information

Zheng et al. 10.1073/pnas.1318460111

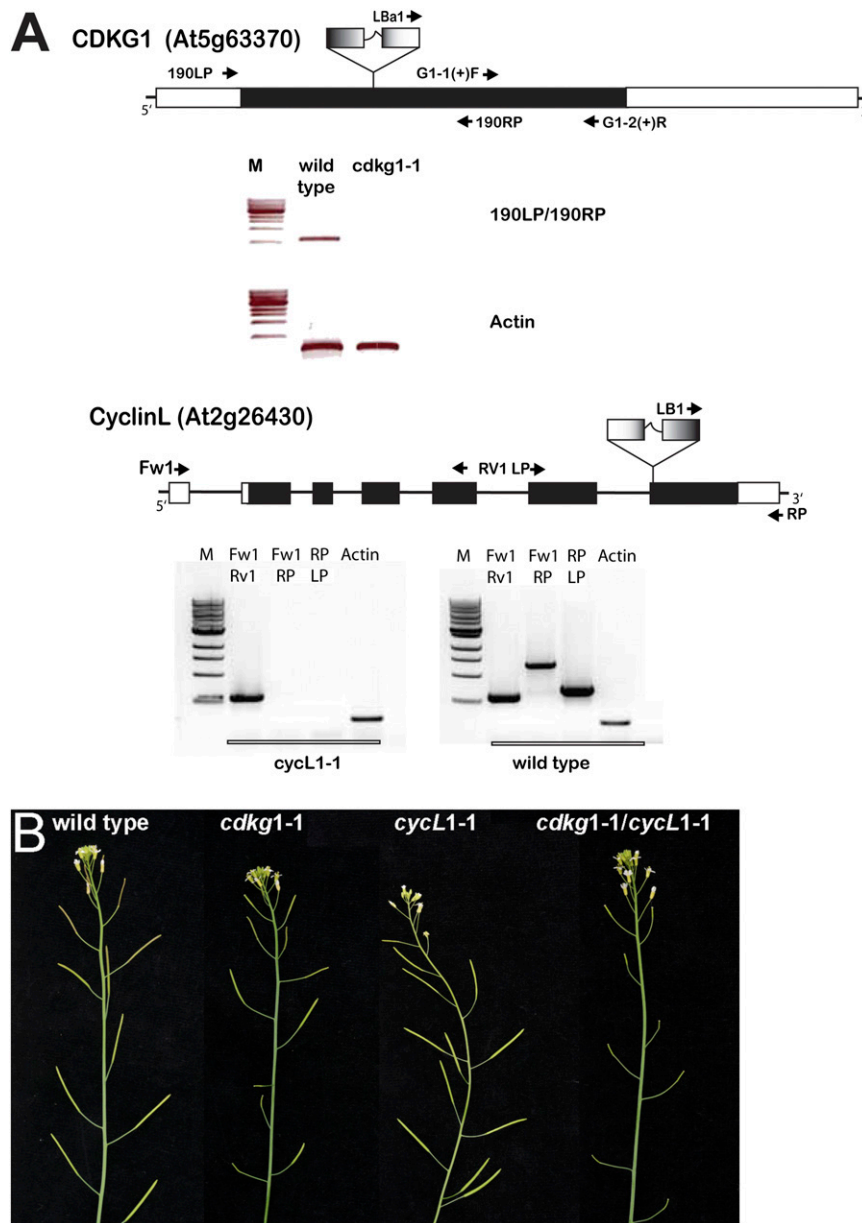

**Fig. S1.** (A) Schematic representation of the T-DNA insertions in *cdkg1-1* and *cycL1-1*, positions of primers used in the study, and RT-PCR confirmation of the insertion sites. Primer sequences are provided in Table S2. (B) Phenotypic consequences of *cdkg1-1* and *cycL1-1* on fertility.

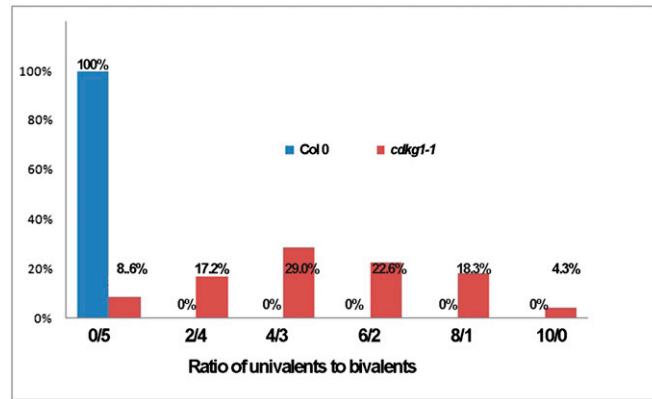

**Fig. S2.** Effect of *cdkg1-1* on bivalent formation. The bars illustrate the ratio of univalent and bivalents in individual cells at metaphase I (red bars represents *cdkg1-1*,  $n = 93$ ; the blue bar represents WT cells,  $n = 37$ ) from plants grown under greenhouse conditions.

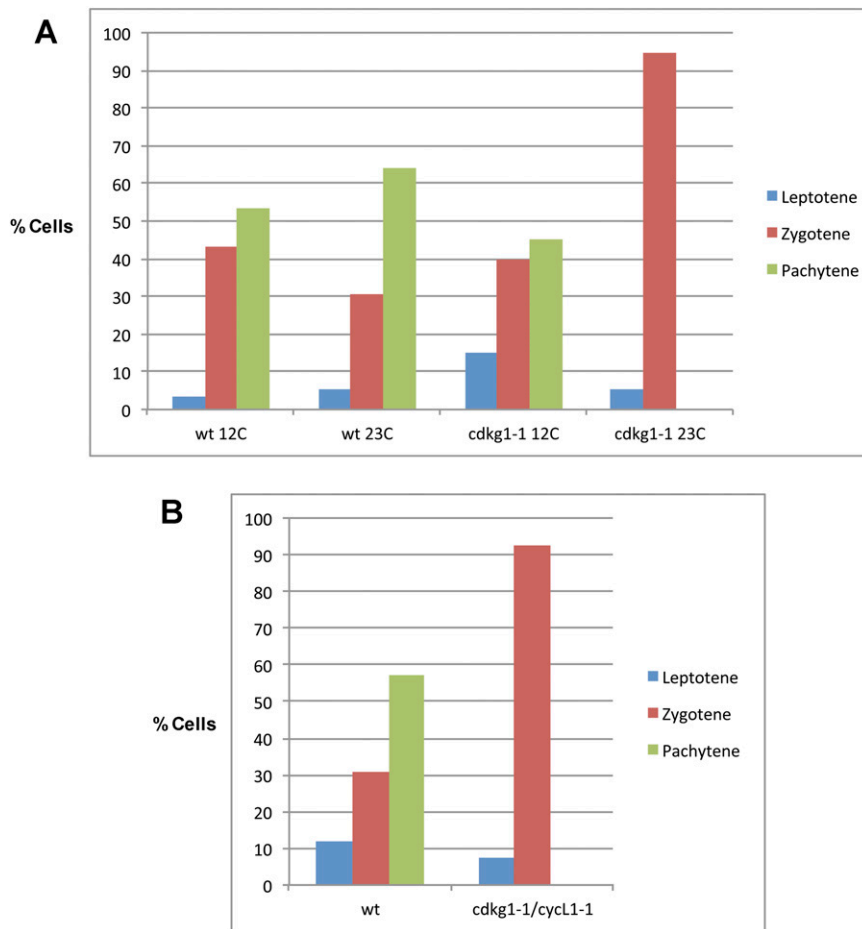

**Fig. S3.** Percentage of meiotic stages in (A) WT and *cdkg1-1* grown at 12 and 23 °C as judged by  $\alpha$ -Asy1 and  $\alpha$ -Zyp staining ( $n$  cells > 39); (B) WT and *cdkg1-1/cycl1-1* ( $n > 49$ ) grown at 12 °C.

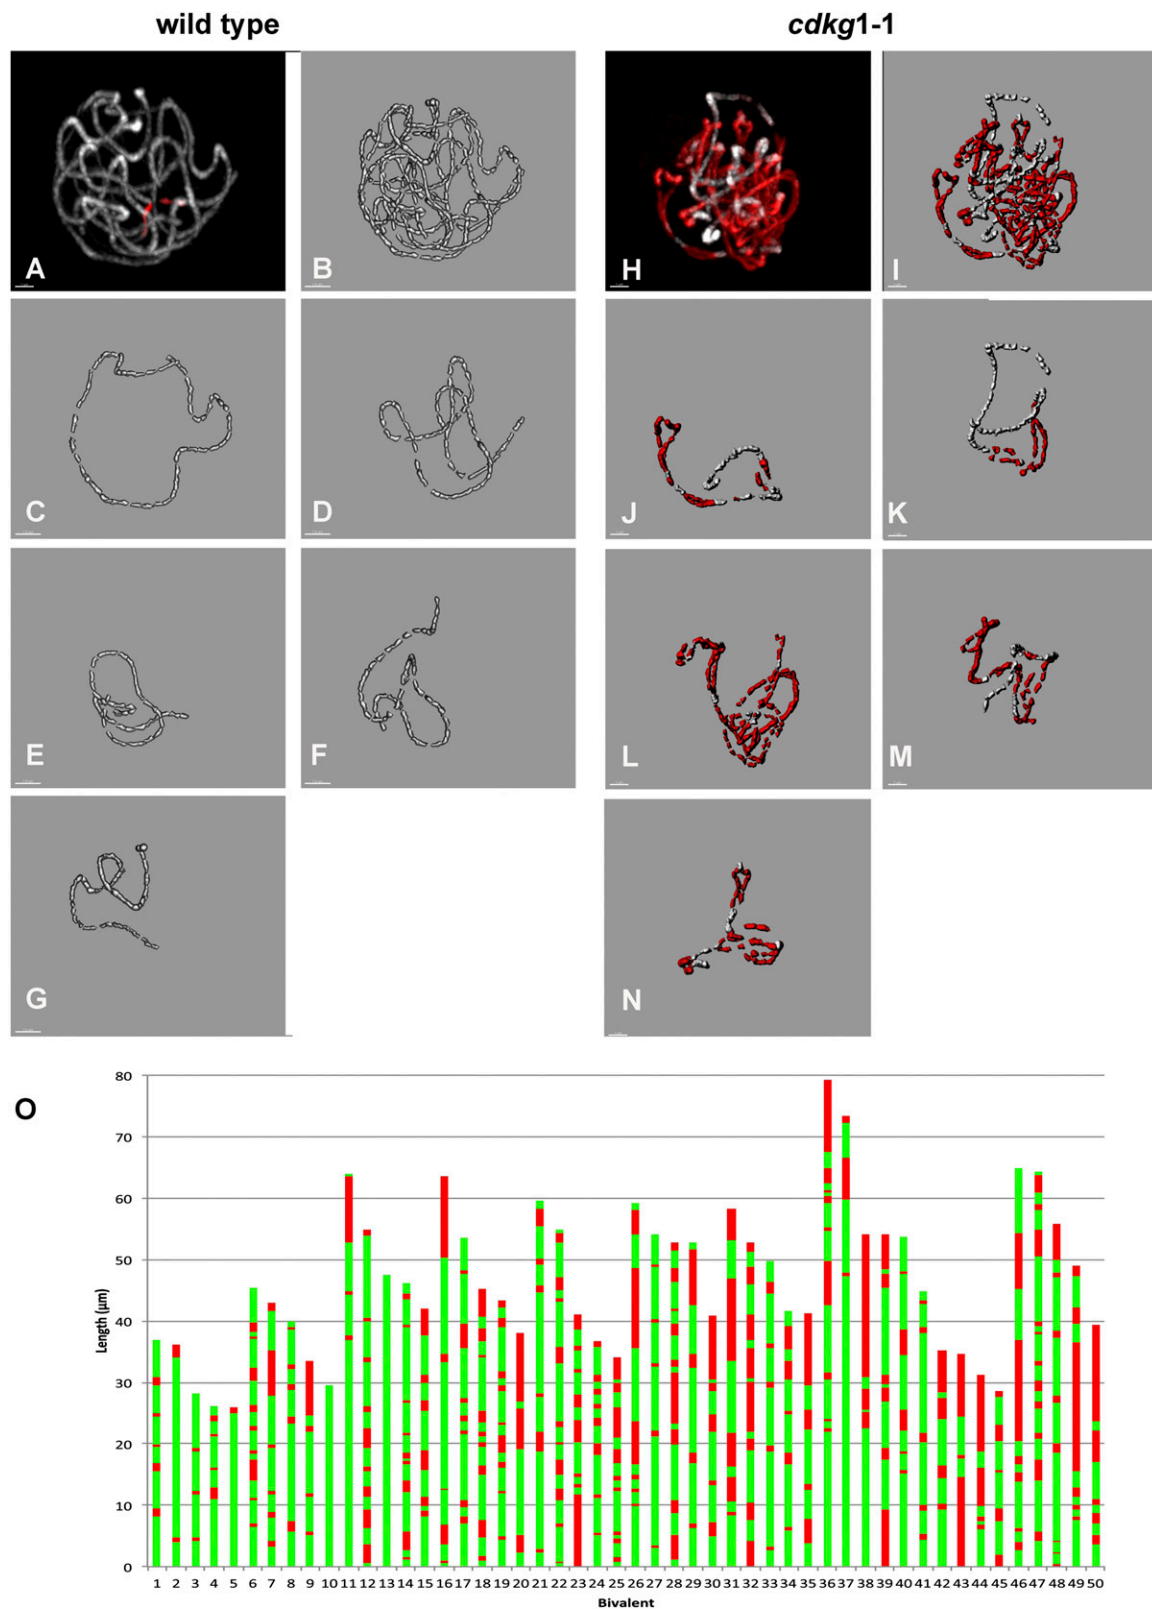

**Fig. 54.** Three-dimensional reconstruction of bivalents from WT pachytene (A–G) and mutant pachytene-like (H–N) meiotic nuclei. Gray represents ZYP1 loading, while red represents ASY1. (O) Schematic representation of ZYP1 loading (red bars) and chromosome length in *cdkg1-1* meiotic nuclei. Data for 50 bivalents in pachytene-like was taken from 3D reconstructions with the least synapsed to the *Left* and the most to the *Right*. Bivalents from the same nucleus are clustered together (i.e., 1–5, 6–10, etc).

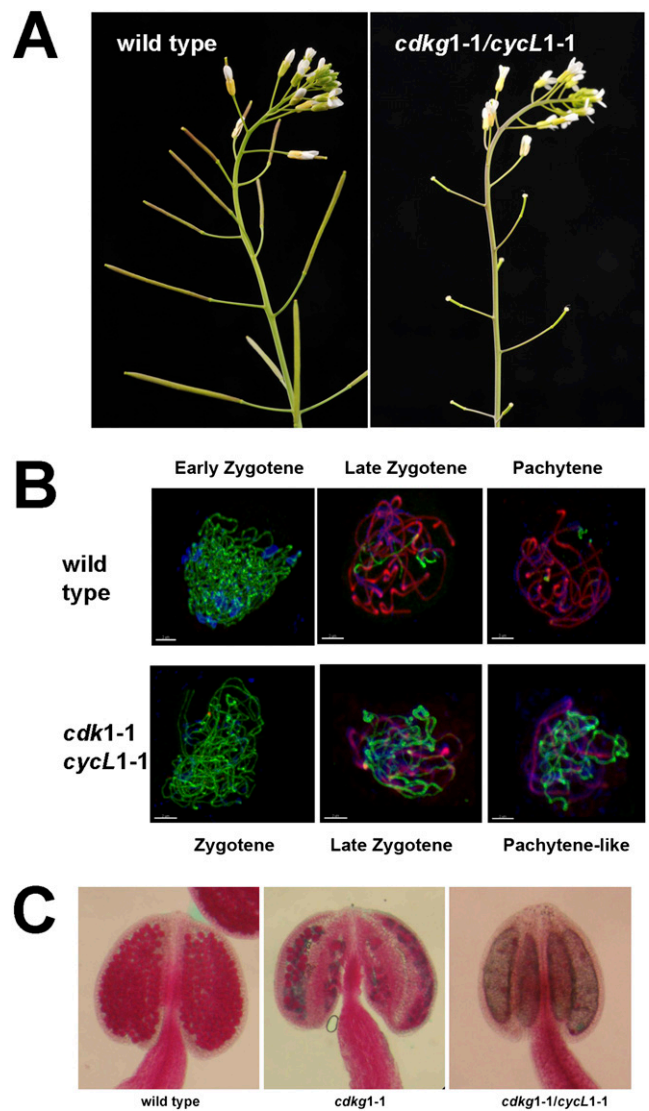

**Fig. S5.** *CDKG1* genetically interacts with *CYCLINL*. (A) Fertility in WT and the double-mutant *cdkg1-1/cyclL1-1*, grown at 12 °C (B) Immunolocalization of the SC proteins ASY1 (green) and ZYP1 (red) in nuclei at different stages of meiosis as indicated. DAPI-stained chromatin is shown in blue. (Scale bar, 2 μm.) (C) Pollen viability in WT, *cdkg1-1* single mutant, and *cdkg1-1/cyclL1-1* double-mutant grown under greenhouse conditions.

**Table S1. Pollen viability as judged by Alexander stain**

|         | WT, 23 °C   |             |                 | <i>cdkg1-1</i> , 23 °C |             |                 |
|---------|-------------|-------------|-----------------|------------------------|-------------|-----------------|
|         | Live pollen | Dead pollen | Live pollen (%) | Live pollen            | Dead pollen | Live pollen (%) |
|         | 213         | 2           | 99.07           | 7                      | 29          | 19.44           |
|         | 132         | 1           | 99.25           | 6                      | 23          | 20.69           |
|         | 225         | 1           | 99.56           | 4                      | 35          | 10.26           |
| Average |             |             | 99.29           |                        |             | 16.80*          |
| SD      |             |             | 0.25            |                        |             | 5.70            |

\*Significantly different from the WT for  $P < 0.001$ .
